# Supplementary material
Source: PubMed Central journal article supplement (PMC2752599)
Supplement: 0908928106_0908928106SI.pdf [file 0908928106_0908928106SI.pdf]

# Supporting Information

Schenk et al. 10.1073/pnas.0908928106

## SI Results

**Characterization of the HERO Culture System.** The HERO culture system allowed hemisphere growth (Fig. S1A–C) and thickening of the cortical wall (Fig. S1D–F and P) to proceed in a manner indistinguishable from hemispheres of embryos developed to E15.5 in utero. Accordingly, the increase in (i) the proportion of neural progenitors expressing the neurogenic marker *Tis21*-GFP (1, 2) (Fig. S1G–I and Q), (ii) apical and basal mitoses (identified by phosphohistone 3 immunofluorescence, Fig. S1J–L and R), and (iii) neurons (identified by  $\beta$ -III-tubulin immunofluorescence, Fig. S1M–O), occurred similarly in 24-h HERO culture as in utero. Thus, with regard to the parameters analyzed, the HERO culture system reproduces cortical neurogenesis and development. Importantly, the direct exposure of neural progenitors to the medium in this system offers 2 decisive advantages with regard to the goal of the present study: first, to explore the possibility of performing pharmacological interference with the actin–myosin system such that INM of APs is inhibited but their progression through the cell cycle, notably cytokinesis, is not; and second, to study INM by BrdU pulse-chase analyses of large populations of APs.

**Effects of Various Concentrations of the Nonmuscle Myosin II Inhibitor Blebbistatin on the Cytoarchitecture of the Cortical Wall.** We investigated the effects of various concentrations of the nonmuscle myosin II inhibitor Bb (3–6) on the overall morphology and cytoarchitecture of the cortical wall after 24 h of HERO culture. When Bb was applied at 100  $\mu$ M, 50  $\mu$ M, or 25  $\mu$ M of the racemate, the overall morphology and integrity of the cortical wall was grossly perturbed (Fig. S2B–D). Moreover, at these Bb concentrations, cortical cytoarchitecture and neurogenesis were massively impaired, as revealed by immunostaining for the neuronal marker  $\beta$ -III-tubulin and analysis of *Tis21*-GFP expression (Fig. S2G–J). These defects were not observed when the Bb concentration was lowered to 12.5  $\mu$ M of the racemate (low-Bb treatment), with the overall morphology (Fig. S2A and E), cortical cytoarchitecture and neurogenesis (Fig. S2F and J; Fig. S3M and N) being essentially similar to control.

**Effects of Low-Blebbistatin Treatment on Apical Progenitors.** Low-Bb treatment for 24 h did not impair the radial morphology of APs as revealed by nestin immunofluorescence (Fig. S4) and the architecture of the VZ as revealed by cadherin immunostaining (Fig. S3A and B), nor the apical–basal polarity of APs as indicated by the unaltered appearance of the ZO-1-positive apical junctional complexes (Fig. S3C, D, G, and H).

Double fluorescence of control hemispheres for F-actin (phalloidin, Fig. S3I) and for activated nonmuscle myosin II (phosphorylated myosin light chain 2, Fig. S3K and O) revealed their relative enrichment at the apical cell cortex. Low-Bb treatment for 24 h altered the apical actomyosin pattern in particular with regard to F-actin staining (Fig. S3J, L, and P). A reduction in intensity and alteration in pattern of the apical F-actin staining upon low-Bb treatment was observed already after 1 h of HERO culture (Fig. S5). Low-Bb treatment for 24 h resulted in a larger cadherin hole (7) of APs (Fig. S3E and F, arrows) and a change of their cell body from an ellipsoid to a more spherical shape (Fig. S3A and B, arrowheads), consistent with a relaxation of the actomyosin cell cortex of VZ progenitors that extended from their apical to their lateral side upon inhibition of nonmuscle myosin II.

**S Phase of Neural Progenitors Occurs in a Less Basal Location upon Myosin II Inhibition.** We investigated the effect of low-Bb treatment on the location of S phase of neural progenitors. To this end, we subjected neural progenitors in HERO culture to low-Bb treatment for 24 h, and identified the position of their S-phase nuclei by a 15-min BrdU pulse at the end of the culture period (Fig. S6A). In control cultures, the distribution of BrdU-labeled nuclei peaked in the basal half of the VZ (Fig. S6B, Left). Low-Bb treatment for 24 h resulted in a shift in the distribution of BrdU-labeled nuclei along the apical–basal axis of the VZ to a less basal localization (Fig. S6B, Right, and C), with the proportion of total BrdU-labeled cells being unchanged by the Bb treatment (Fig. S6D).

## SI Materials and Methods

**HERO Culture and Blebbistatin Treatment.** Unless indicated otherwise, C57BL/6 mouse embryos were used. The *Tis21*-GFP knock-in mouse line (2) was maintained as homozygotes in the C57BL/6 background and mated with wild-type C57BL/6 females to obtain heterozygous embryos for the experiments. All experiments were performed in accordance with German and European Union animal welfare legislation.

The HERO culture system established in the present study differs significantly from the whole brain culture and the telencephalic organ culture described previously (8) with regard to parameters such as removal of meninges, culture medium, and mode of culture of hemispheres. Specifically, dissected brains of E14.5 embryos were placed in Tyrode solution at room temperature and cut at the boundary between diencephalon and midbrain, and the diencephalon was removed from the forebrain to obtain the telencephalic hemispheres. During this preparation, the meninges were removed surgically. Hemispheres were transferred to 20-mL glass flasks (1–2 hemispheres per flask) containing 1.5 mL per flask of DMEM/F12 medium supplemented with  $1\times$  N2 (Invitrogen),  $1\times$  B27 (Invitrogen), and 100 units/mL penicillin/streptomycin (Gibco BRL), and cultured for up to 24 h in a whole-embryo culture incubator (RKI Ikemoto) at 37 °C in an atmosphere of 60% O<sub>2</sub>, 5% CO<sub>2</sub>, 35% N<sub>2</sub>, with continuous rotation at 26 rpm, which ensured flotation of hemispheres.

In Bb experiments, hemispheres were allowed to equilibrate for 30 min under the above conditions and then transferred to flasks with fresh, prewarmed, and oxygenated medium containing 0.1% DMSO and (+/–)Bb as indicated. Bb (Tocris) was dissolved in DMSO (Sigma) and was added from a 12.5 mM stock to the medium to a final concentration of 12.5  $\mu$ M (0.1% DMSO). Contralateral hemispheres were used as controls.

At the end of HERO culture, hemispheres were fixed for 16 h at 4 °C in 4% paraformaldehyde in 120 mM phosphate buffer pH 7.4. Hemispheres were cryoprotected by incubation for 4 h in 30% sucrose in PBS, embedded in O.C.T. medium (Sakura), and frozen at –20 °C.

**BrdU Labeling.** For S-phase labeling, 50  $\mu$ M BrdU (Sigma) was added to the medium during the last 15 min of HERO culture. For cumulative BrdU labeling, 50  $\mu$ M of BrdU was added to the medium at the beginning of HERO culture, which was then continued for the indicated times up to 22 h. For BrdU pulse-chase labeling, hemispheres preequilibrated in HERO culture were transferred to flasks with medium containing 0.1% DMSO and (+/–)Bb as indicated, and cultured for 15 min. BrdU (50  $\mu$ M) was added and HERO culture continued for another 15



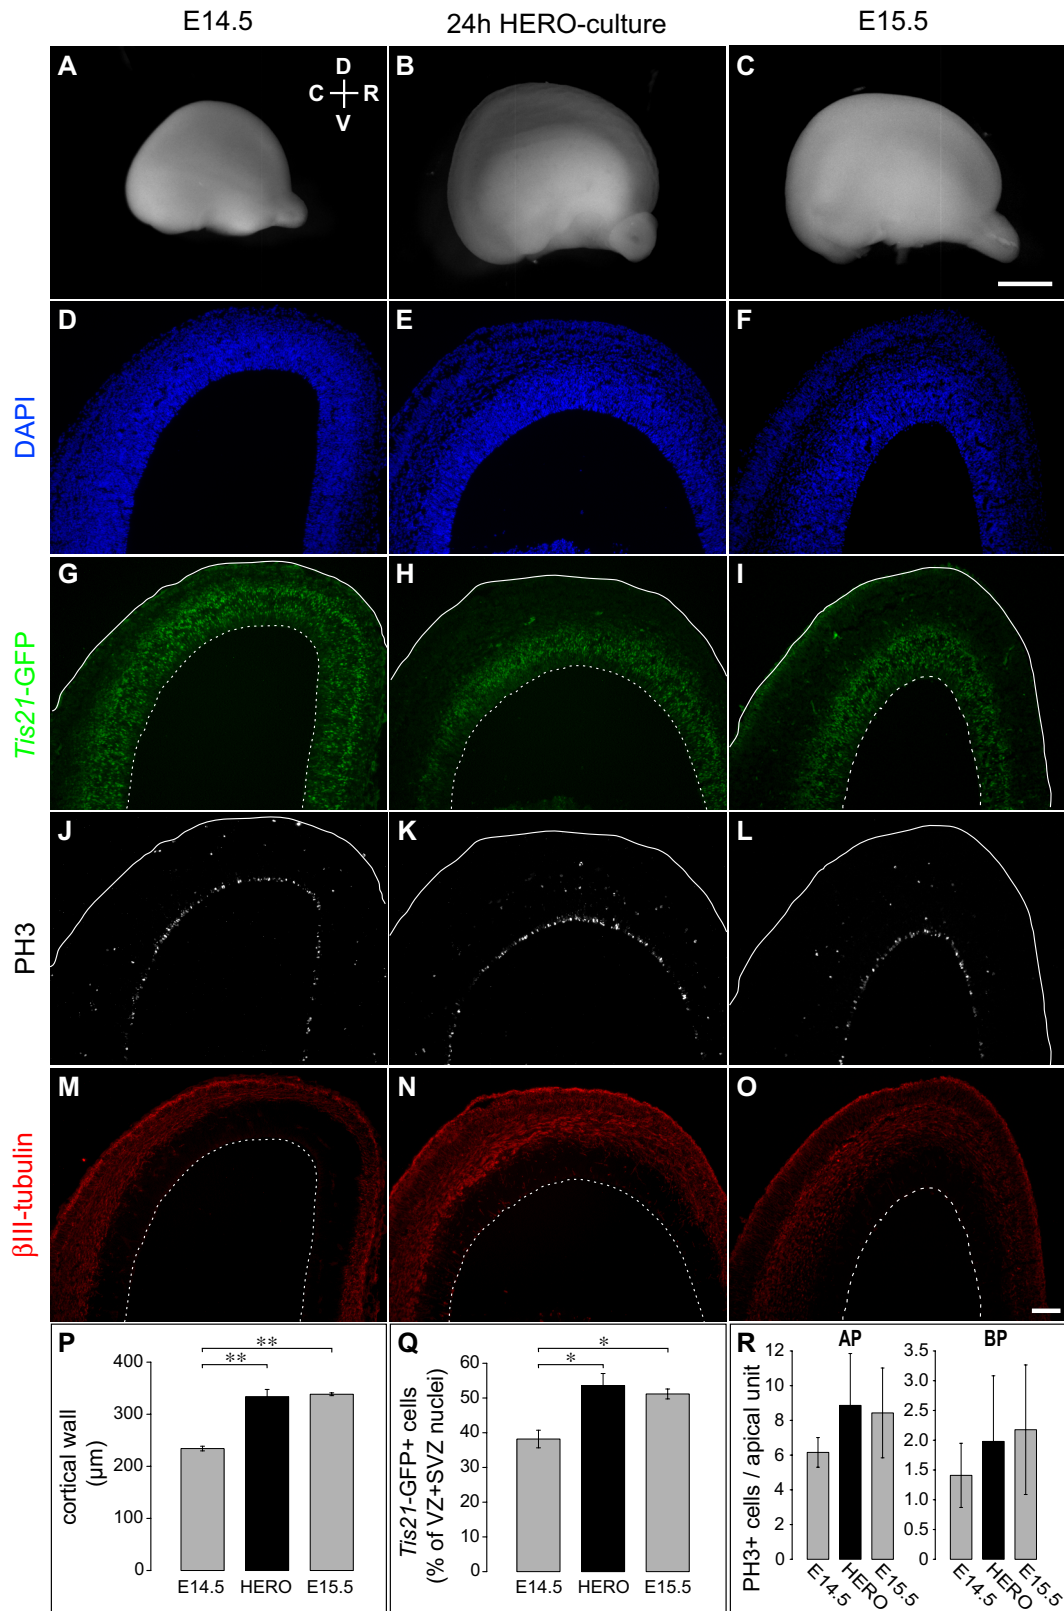

**Fig. S1.** Characterization of the HERO culture system. (A–O) Morphological features of a representative mouse E14.5 hemisphere subjected to HERO culture for 24 h (B, E, H, K, and N), in comparison to E14.5 (A, D, G, J, and M) and E15.5 (C, F, I, L, and O) hemispheres, all from *Tis21-GFP* mice. (A–C) Whole-mount view of entire hemisphere after fixation. D, dorsal; V, ventral; R, rostral; C, caudal. (Scale bar, 1 mm.) (D–O) Quadruple (immuno)fluorescence for DAPI (D–E, blue), intrinsic *Tis21-GFP* (G–I, green), phosphohistone 3 (PH3, J–L, white), and  $\beta$ -III-tubulin (M–O, red). Solid and dashed lines indicate the pial and ventricular surface, respectively. Dorsal is up and lateral is to the left. (Scale bar, 100  $\mu\text{m}$ .) (P–R) Hemispheres were treated and analyzed as in A–O followed by quantification of cortical wall thickness (P); *Tis21-GFP*-positive cells, expressed as percentage of total nuclei in the VZ plus SVZ as revealed by DAPI staining (Q); and phosphohistone 3-positive (PH3<sup>+</sup>) cells, expressed per 100  $\mu\text{m}$  of apical surface. Data are the mean of 3 hemispheres; bars indicate SEM; \*,  $P < 0.05$ ; \*\*,  $P < 0.01$ ; number of nuclei and mitoses quantified are given in Table S2.

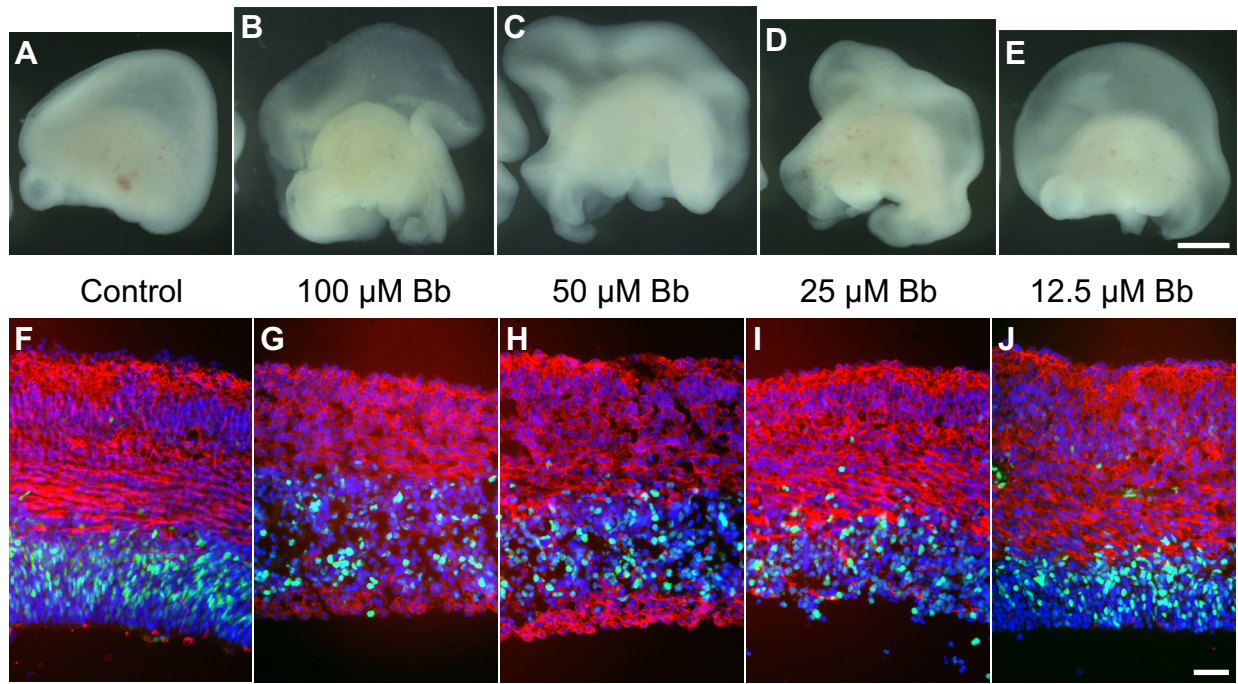

**Fig. S2.** Effects of various concentrations of blebbistatin on the cytoarchitecture of the cortical wall. Mouse E14.5 hemispheres from *Tis21*-GFP mice subjected to HERO culture for 24 h in the absence (control; *A* and *F*) or presence of 100  $\mu$ M (*B* and *G*), 50  $\mu$ M (*C* and *H*), 25  $\mu$ M (*D* and *I*), and 12.5  $\mu$ M (*E* and *J*) Bb. (*A–E*) Whole-mount view of entire hemisphere after fixation. Dorsal is up and rostral is to the left. (Scale bar, 1 mm.) (*F–J*) Triple (immuno)fluorescence for DAPI (blue), intrinsic *Tis21*-GFP (green), and  $\beta$ -III-tubulin (red). Ventricular side is down. (Scale bar, 50  $\mu$ m.)

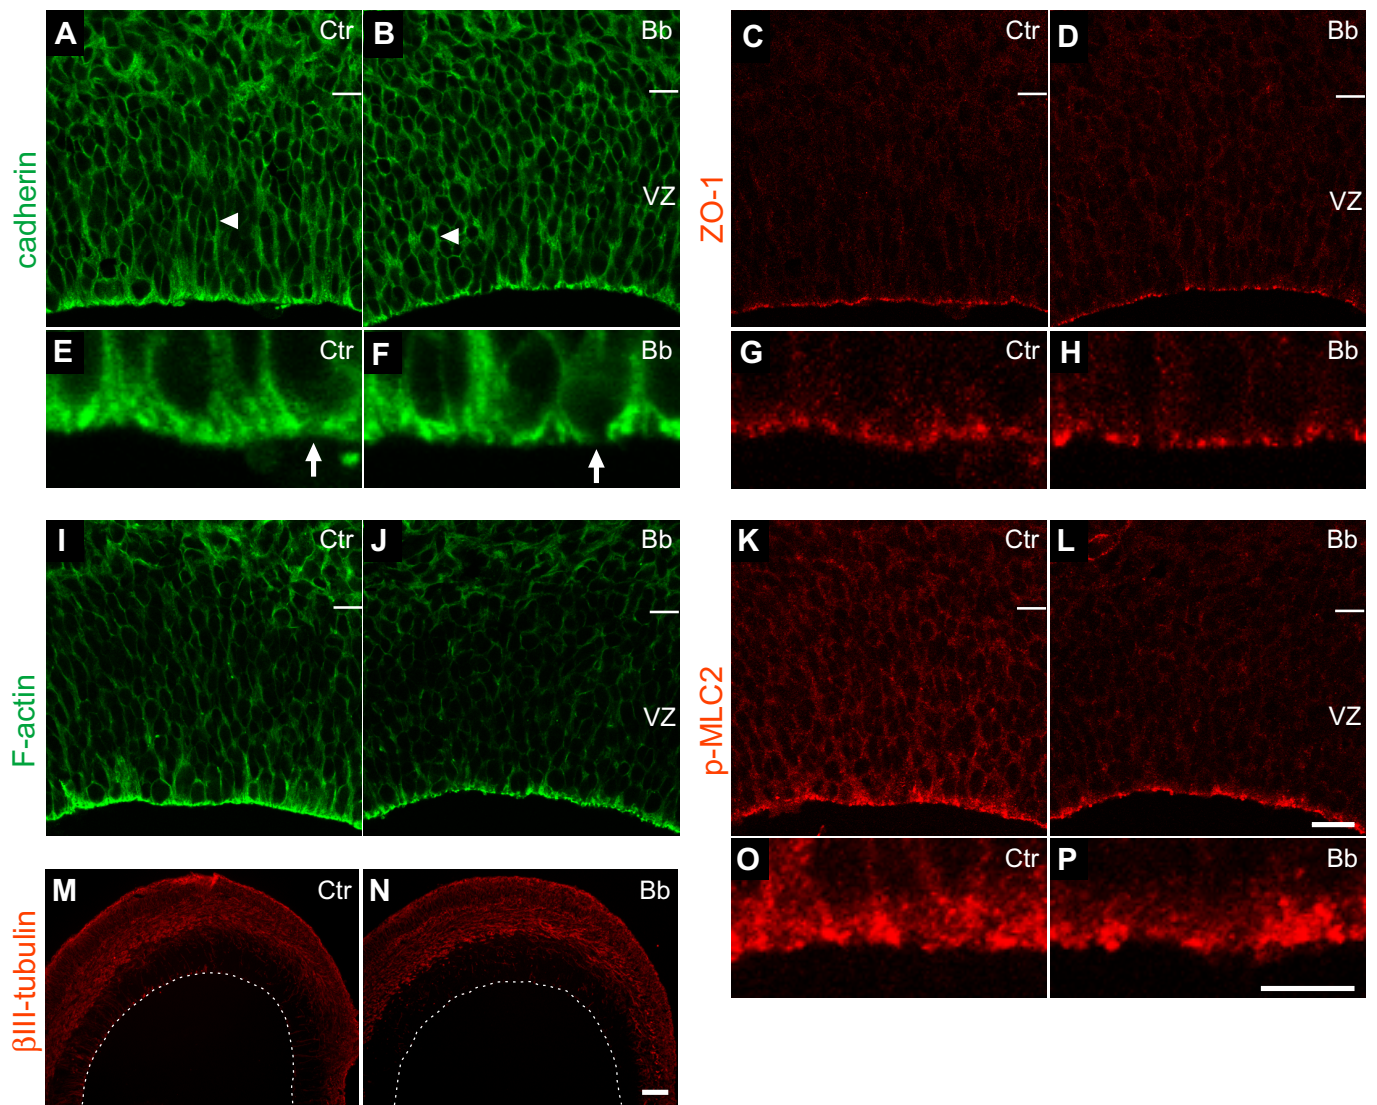

**Fig. S3.** Effects of low-blebbistatin treatment on apical progenitors. Mouse E14.5 hemispheres subjected to HERO culture for 24 h in the absence (control, Ctr; A, C, E, G, I, K, M, and O) or presence (Bb; B, D, F, H, J, L, N, and P) of 12.5  $\mu$ M Bb. (A–L, O and P) Double (immuno)fluorescence for either cadherin (A, B, E, and F, green) and ZO-1 (C, D, G, and H, red) or phalloidin (I and J, green) and phosphomyosin light chain 2 (p-MLC2; K, L, O, and P, red). All images are 1- $\mu$ m optical sections. Ventricular surface is down. Arrowheads in A and B indicate a representative ellipsoid and spherical cell body, respectively. Arrows in E and F indicate the cadherin hole; note its larger size upon low-Bb treatment. The basal boundary of the VZ is indicated by white lines at the right margins. (Scale bar, 20  $\mu$ m in L and applies also to A–D and I–K.) (Scale bar, 10  $\mu$ m in P and applies also to E–H and O.) (M and N) Immunofluorescence for  $\beta$ -III-tubulin (red). Dashed lines indicate ventricular surface. (Scale bar, 100  $\mu$ m.)

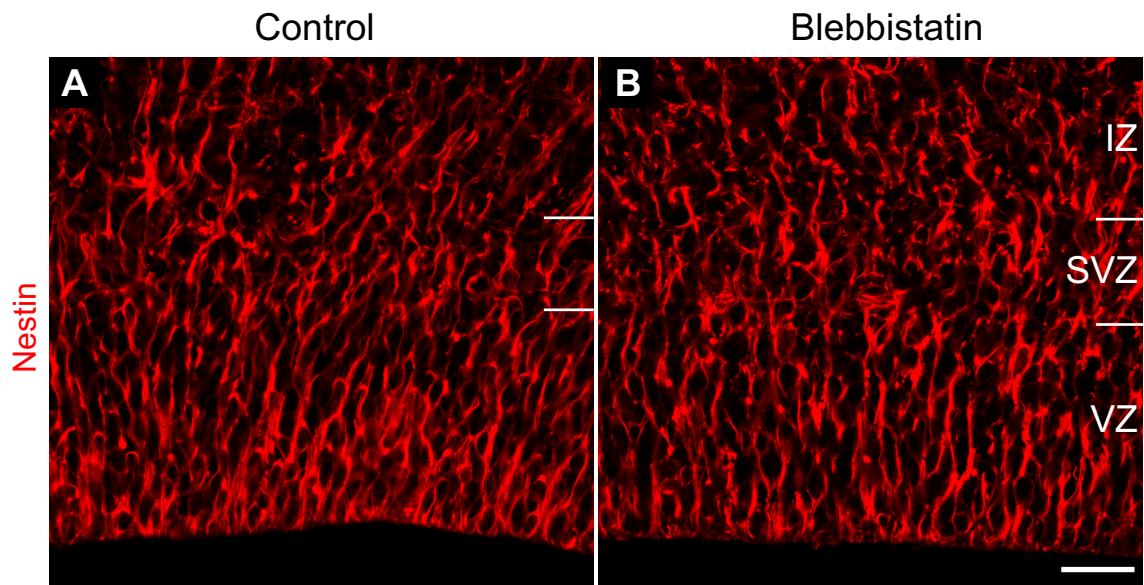

**Fig. S4.** Low-blebbistatin treatment does not alter the radial morphology of apical progenitors. E14.5 hemispheres were subjected to HERO culture for 24 h in the absence (control) or presence of 12.5  $\mu\text{M}$  Bb, followed by immunofluorescence for nestin (3- $\mu\text{m}$  single optical sections). Ventricular surface is down; boundaries of VZ, SVZ, and intermediate zone (IZ) are indicated at the right margins. (Scale bar, 30  $\mu\text{m}$ .)



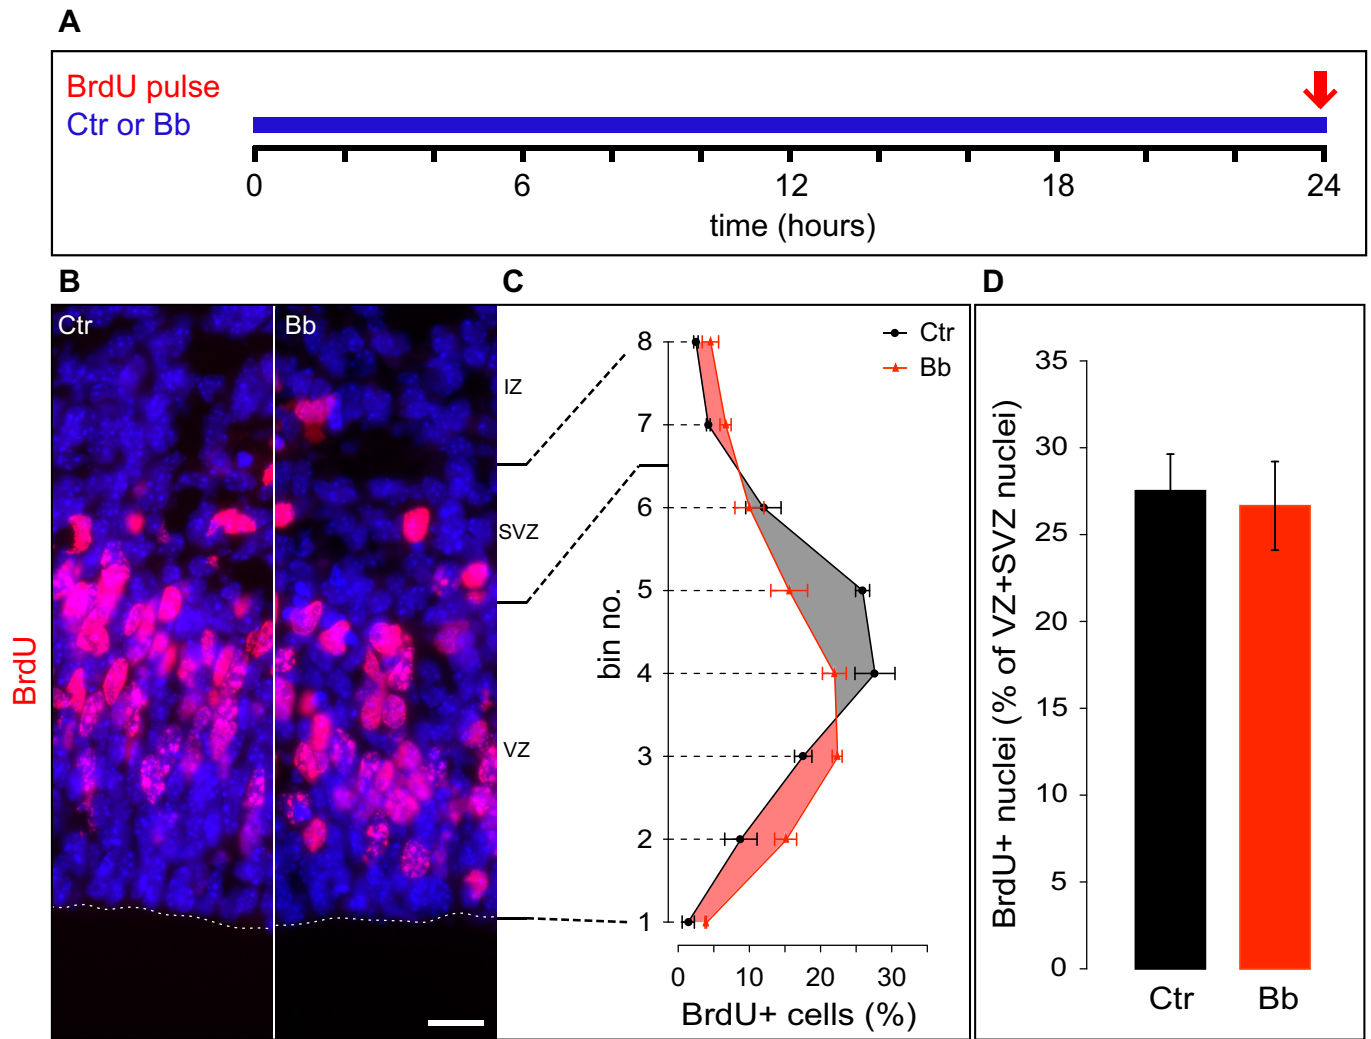

**Fig. S6.** Low-blebbistatin treatment alters the localization of S-phase nuclei of neural progenitors. E14.5 hemispheres were subjected to HERO culture for 24 h in the absence (control, Ctr) or presence of 12.5  $\mu$ M Bb (A, blue bar), with BrdU being present during the last 15 min (A, red arrow), followed by double (immuno)fluorescence for BrdU (red) and DAPI (blue) (B). Dashed lines indicate ventricular surface; boundaries of VZ, SVZ, and intermediate zone (IZ) are indicated at the right margin. (Scale bar, 20  $\mu$ m.) (C) Distribution of BrdU-positive nuclei across the VZ plus SVZ, divided into 8 equidistant bins as indicated, with bin no. 1 being at the ventricle and bin no. 8 at the SVZ–IZ boundary. BrdU-positive nuclei in a given bin are expressed as percentage of the total number of labeled nuclei in all 8 bins. Black curve and circles, control (Ctr); red curve and triangles, Bb; differences between control and Bb values are statistically significant (bin no. 5  $P < 0.05$ ) and are highlighted by black (control  $>$  Bb) and red (Bb  $>$  control) shading. (D) Quantification of BrdU-positive nuclei, expressed as percentage of total nuclei in the VZ plus SVZ as revealed by DAPI staining. (C and D) Data are the mean of 3 hemispheres; bars indicate SEM. Number of BrdU-labeled (C) and DAPI-stained (D) nuclei quantified are given in Table S2.



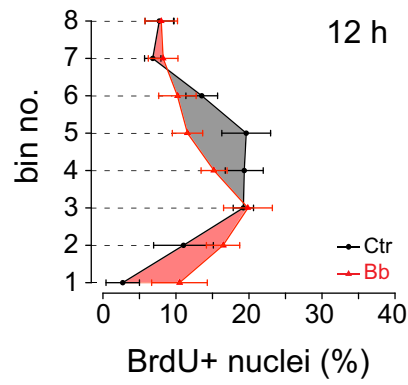

**Fig. S7.** Low-blebbistatin treatment impairs apical-to-basal nuclear migration/translocation of *Tis21*-GFP-positive progenitors. E14.5 hemispheres from heterozygous *Tis21*-GFP mice in HERO culture were subjected to 15-min BrdU pulse labeling followed by chase for 12 h, in the absence (control, Ctr; black curves) or presence (Bb; red curves) of 12.5  $\mu$ M Bb. Data show the distribution of BrdU-labeled *Tis21*-GFP-positive nuclei across the VZ plus SVZ (bin analysis and shading as in Fig. S6) and are the mean of 3–4 hemispheres; bars indicate SEM. Ctr and Bb curves are significantly different with a KS *P* value of <0.001. Number of BrdU-labeled *Tis21*-GFP-positive nuclei counted are given in Table S2.

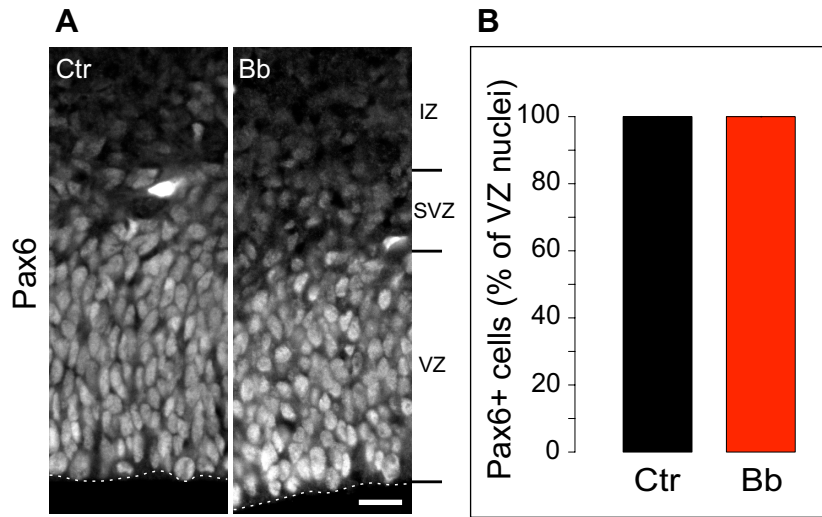

**Fig. S8.** Low-blebbistatin treatment does not reduce the proportion of Pax6-positive VZ progenitors. E14.5 hemispheres were subjected to HERO culture for 24 h in the absence (control, Ctr) or presence of 12.5  $\mu\text{M}$  Bb, followed by immunofluorescence for Pax6 (A). Dashed lines indicate ventricular surface; boundaries of VZ, SVZ, and intermediate zone (IZ) are indicated at the right margin. (Scale bar, 20  $\mu\text{m}$ .) (B) Quantification of Pax6-positive nuclei in the VZ, expressed as percentage of total nuclei in the VZ as revealed by DAPI staining. Data are the mean of 3 hemispheres.

**Table S1. Cell cycle parameters of control and low-blebbistatin-treated VZ progenitors**

| Condition    | $T_C - T_S$ (h) | $T_S$ (h) | $T_C$ (h) | $T_{G2 + M}$ (h) | $T_{G1}$ (h) | GF (% $\pm$ SEM) |
|--------------|-----------------|-----------|-----------|------------------|--------------|------------------|
| Control      | 9.6             | 4.0       | 13.6      | 1.7              | 7.9          | 96 $\pm$ 1       |
| Blebbistatin | 9.3             | 4.3       | 13.6      | 1.7              | 7.6          | 96 $\pm$ 1       |

The cumulative BrdU-labeling data shown in Fig. 3A were used to calculate the growth fraction (GF) and the length of S phase ( $T_S$ ) and of the total cell cycle minus S phase ( $T_C - T_S$ ) [Nowakowski RS, Lewin SB, Miller MW (1989) *J Neurocytol* 18:311–318]. The BrdU pulse-chase data of Fig. 3B were used to determine the average G2 + M ( $T_{G2 + M}$ ). These data were then used to also calculate the length of the total cell cycle ( $T_C$ ) and of G1 ( $T_{G1}$ ).

**Table S2. Numbers of cells, nuclei, and mitoses quantified in this study**

| Figure                  | Control | Bb    | Parameter                         |
|-------------------------|---------|-------|-----------------------------------|
| 1 <i>E</i> and <i>F</i> | 227     | 202   | Interjunctional distance          |
| 2 <i>B</i>              | 1,261   | 1,109 | BrdU + nuclei                     |
| 2 <i>D</i>              | 1,653   | 1,502 | BrdU + nuclei                     |
| 2 <i>F</i>              | 2,016   | 1,896 | BrdU + nuclei                     |
| 2 <i>H</i>              | 2,502   | 1,805 | BrdU + nuclei                     |
| 2 <i>J</i>              | 2,597   | 2,051 | BrdU + nuclei                     |
| 2 <i>L</i>              | 2,647   | 2,378 | BrdU + nuclei                     |
| 2 <i>N</i>              | 2,468   | 2,330 | BrdU + nuclei                     |
| 2 <i>P</i>              | 2,631   | 2,065 | BrdU + nuclei                     |
| 3 <i>A</i> , 1 h        | 1,064   | 1,675 | DAPI nuclei                       |
| 3 <i>A</i> , 5 h        | 1,683   | 1,715 | DAPI nuclei                       |
| 3 <i>A</i> , 9 h        | 1,986   | 1,779 | DAPI nuclei                       |
| 3 <i>A</i> , 14 h       | 1,902   | 1,708 | DAPI nuclei                       |
| 3 <i>A</i> , 22 h       | 1,336   | 1,386 | DAPI nuclei                       |
| 3 <i>B</i> , 1 h        | 30      | 40    | PH3 + mitoses                     |
| 3 <i>B</i> , 2 h        | 49      | 60    | PH3 + mitoses                     |
| 3 <i>B</i> , 3 h        | 47      | 43    | PH3 + mitoses                     |
| 3 <i>B</i> , 4 h        | 60      | 51    | PH3 + mitoses                     |
| 3 <i>B</i> , 6 h        | 58      | 35    | PH3 + mitoses                     |
| 4 <i>B</i>              | 921     | 1,360 | Tbr2 + nuclei                     |
| 4 <i>C</i>              | 3,463   | 3,198 | DAPI nuclei                       |
| 4 <i>E</i>              | 1,874   | 1,959 | <i>Tis21</i> -GFP + nuclei        |
| 4 <i>F</i>              | 3,945   | 3,703 | DAPI nuclei                       |
| 4 <i>H</i>              | 130     | 119   | PH3 + mitoses                     |
| 4 <i>I</i>              | 2,621   | 2,677 | DAPI nuclei                       |
| 5 <i>A</i>              | 336     | 356   | BrdU + <i>Tis21</i> -GFP- nuclei  |
| 5 <i>B</i>              | 172     | 438   | BrdU + <i>Tis21</i> -GFP- nuclei  |
| S1 <i>Q</i> , E14.5     | 1,074   |       | DAPI nuclei                       |
| S1 <i>Q</i> , HERO      | 790     |       | DAPI nuclei                       |
| S1 <i>Q</i> , E15.5     | 901     |       | DAPI nuclei                       |
| S1 <i>R</i> , E14.5     | 55      |       | PH3 + mitoses                     |
| S1 <i>R</i> , HERO      | 88      |       | PH3 + mitoses                     |
| S1 <i>R</i> , E15.5     | 72      |       | PH3 + mitoses                     |
| S6 <i>C</i>             | 449     | 439   | BrdU + nuclei                     |
| S6 <i>D</i>             | 1,633   | 1,686 | DAPI nuclei                       |
| S7                      | 666     | 459   | BrdU + <i>Tis21</i> -GFP + nuclei |
